# Supplementary material
Source: PubMed Central journal article supplement (PMC4426246)
Supplement: NIHMS659053-supplement-suppl_fig_2.pdf [file NIHMS659053-supplement-suppl_fig_2.pdf]

**a**

Ctrl shRNA  
Obsc shRNA-2

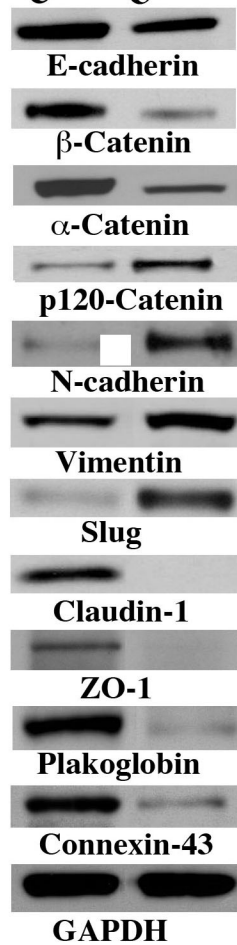**b**

Ctrl siRNA  
Slug siRNA

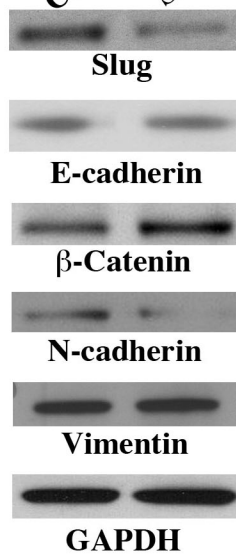**c**

Ctrl siRNA  
Obsc siRNA

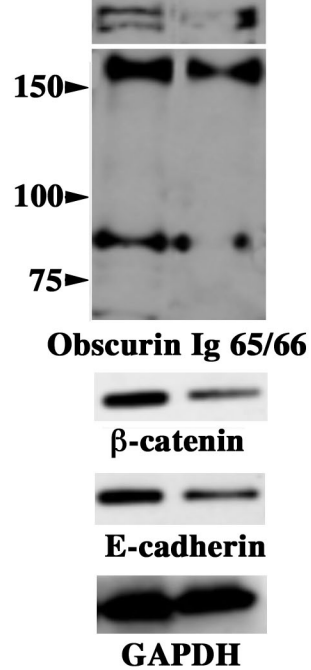**d**

Ctrl shRNA  
Obsc shRNA-1

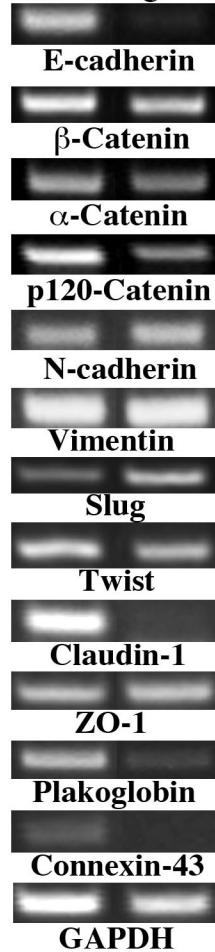

Supplemental Figure 2
